# Supplementary material for: Accelerated and Improved Differentiation of Retinal Organoids from Pluripotent Stem Cells in Rotating-Wall Vessel Bioreactors
Source: PubMed Central journal article supplement — Stem Cell Reports. 2017 Dec 7;10(1):300–13. doi: 10.1016/j.stemcr.2017.11.001 (PMC5768666; doi:10.1016/j.stemcr.2017.11.001), 2017-12-07
Supplement: mmc1.pdf [file mmc1.pdf]

**Stem Cell Reports, Volume 10**

**Supplemental Information**

**Accelerated and Improved Differentiation of Retinal Organoids from  
Pluripotent Stem Cells in Rotating-Wall Vessel Bioreactors**

**Tyler DiStefano, Holly Yu Chen, Christopher Panebianco, Koray Dogan Kaya, Matthew J. Brooks, Linn Gieser, Nicole Y. Morgan, Tom Pohida, and Anand Swaroop**

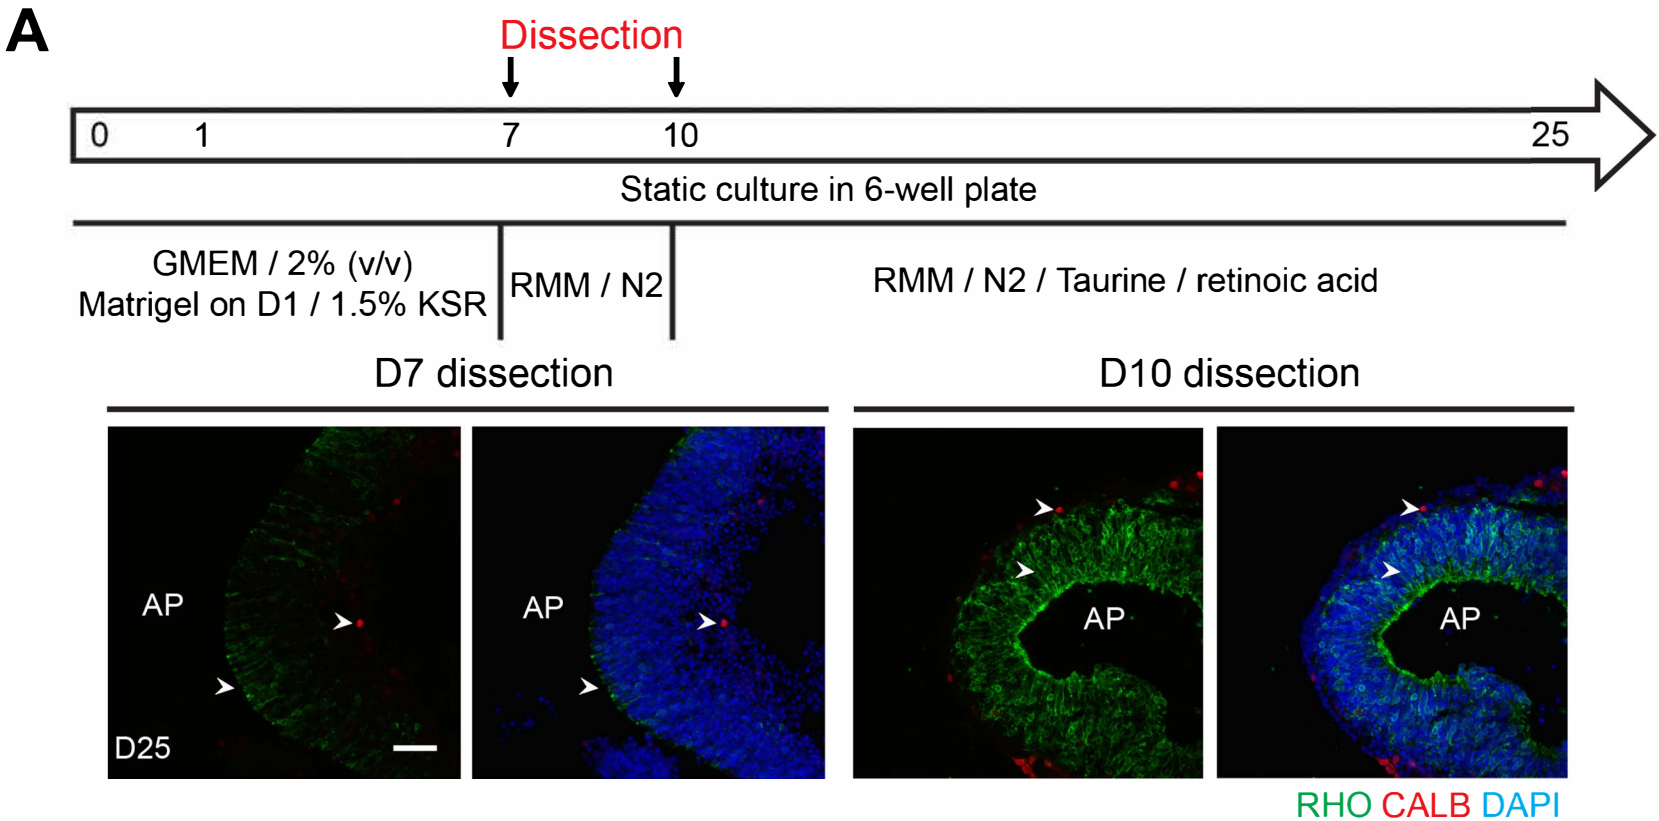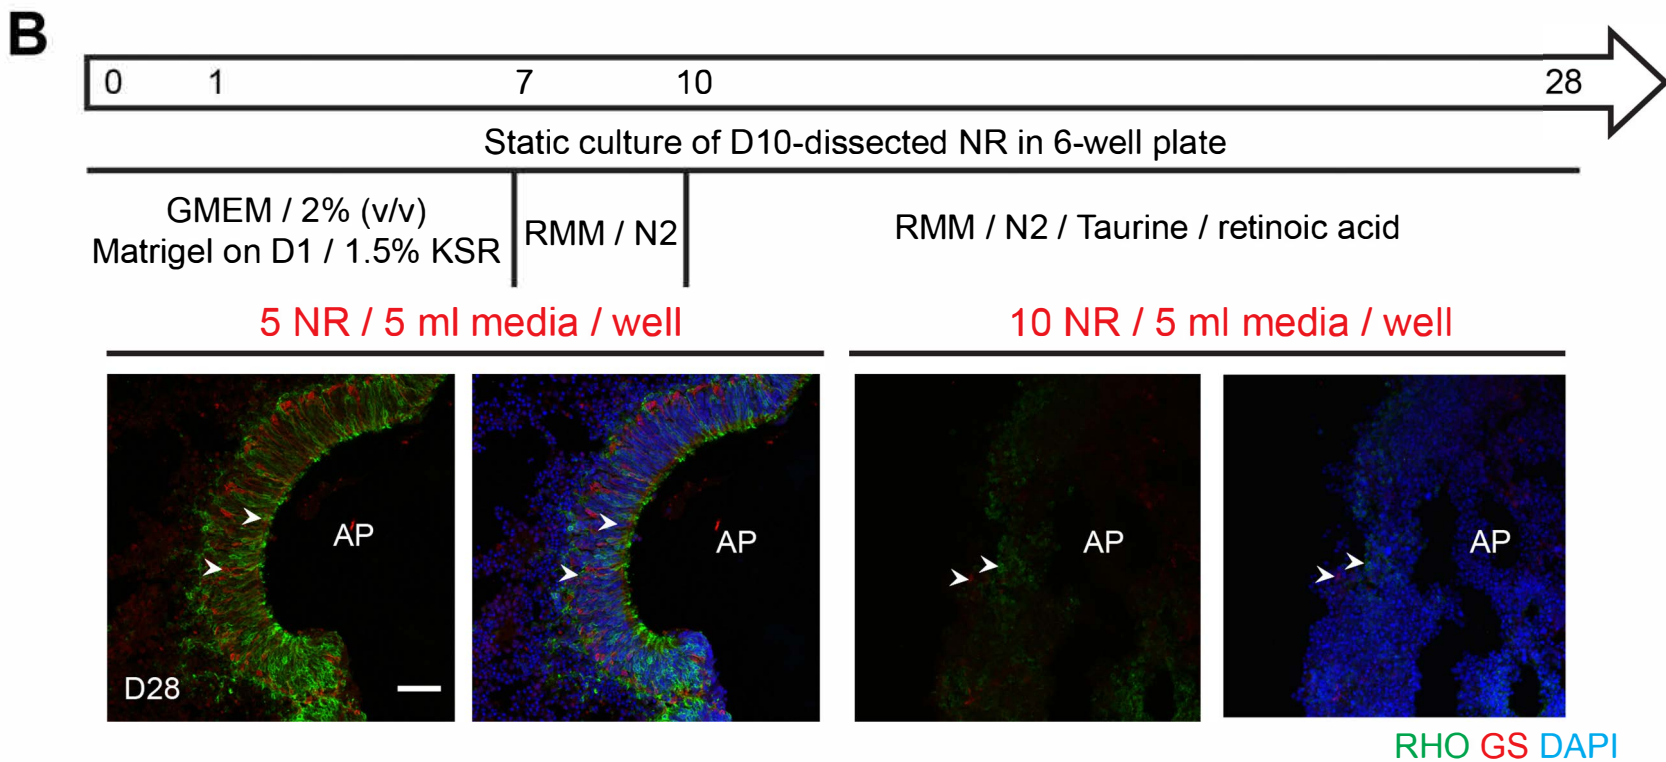

**Figure S1 (related to Figure 1E)**

**Optimization of organoid culture conditions by: (A) optic cup dissection day and (B) neural retina (NR) seeding density.** Numbers in arrows show the differentiation day. GMEM: Glasgow minimum essential medium; KSR: knockout serum replacement; RMM: retinal maturation medium constituted of DMEM/F12 with GlutaMAX, 1x penicillin/streptomycin, 1x 2-mercaptoethanol and 1x N2 supplement; FBS: fetal bovine serum; N2: N2 supplement. Rhodopsin (RHO, green) is a marker for rod photoreceptors in (A) and (B). Calbindin (CALB, red) is a marker for horizontal and amacrine cells in (A). Glutamine synthetase (GS, red) is a marker for Muller glia in (B). All nuclei were stained with 4',6-diamidino-2-phenylindole (DAPI, blue). Representative figures are shown for each condition. Arrowheads indicate relevant immunostaining with (A) and (B) RHO, (A) CALB and (B) GS. AP shows the apical side of the organoids. Scale bar: 50  $\mu$ m.

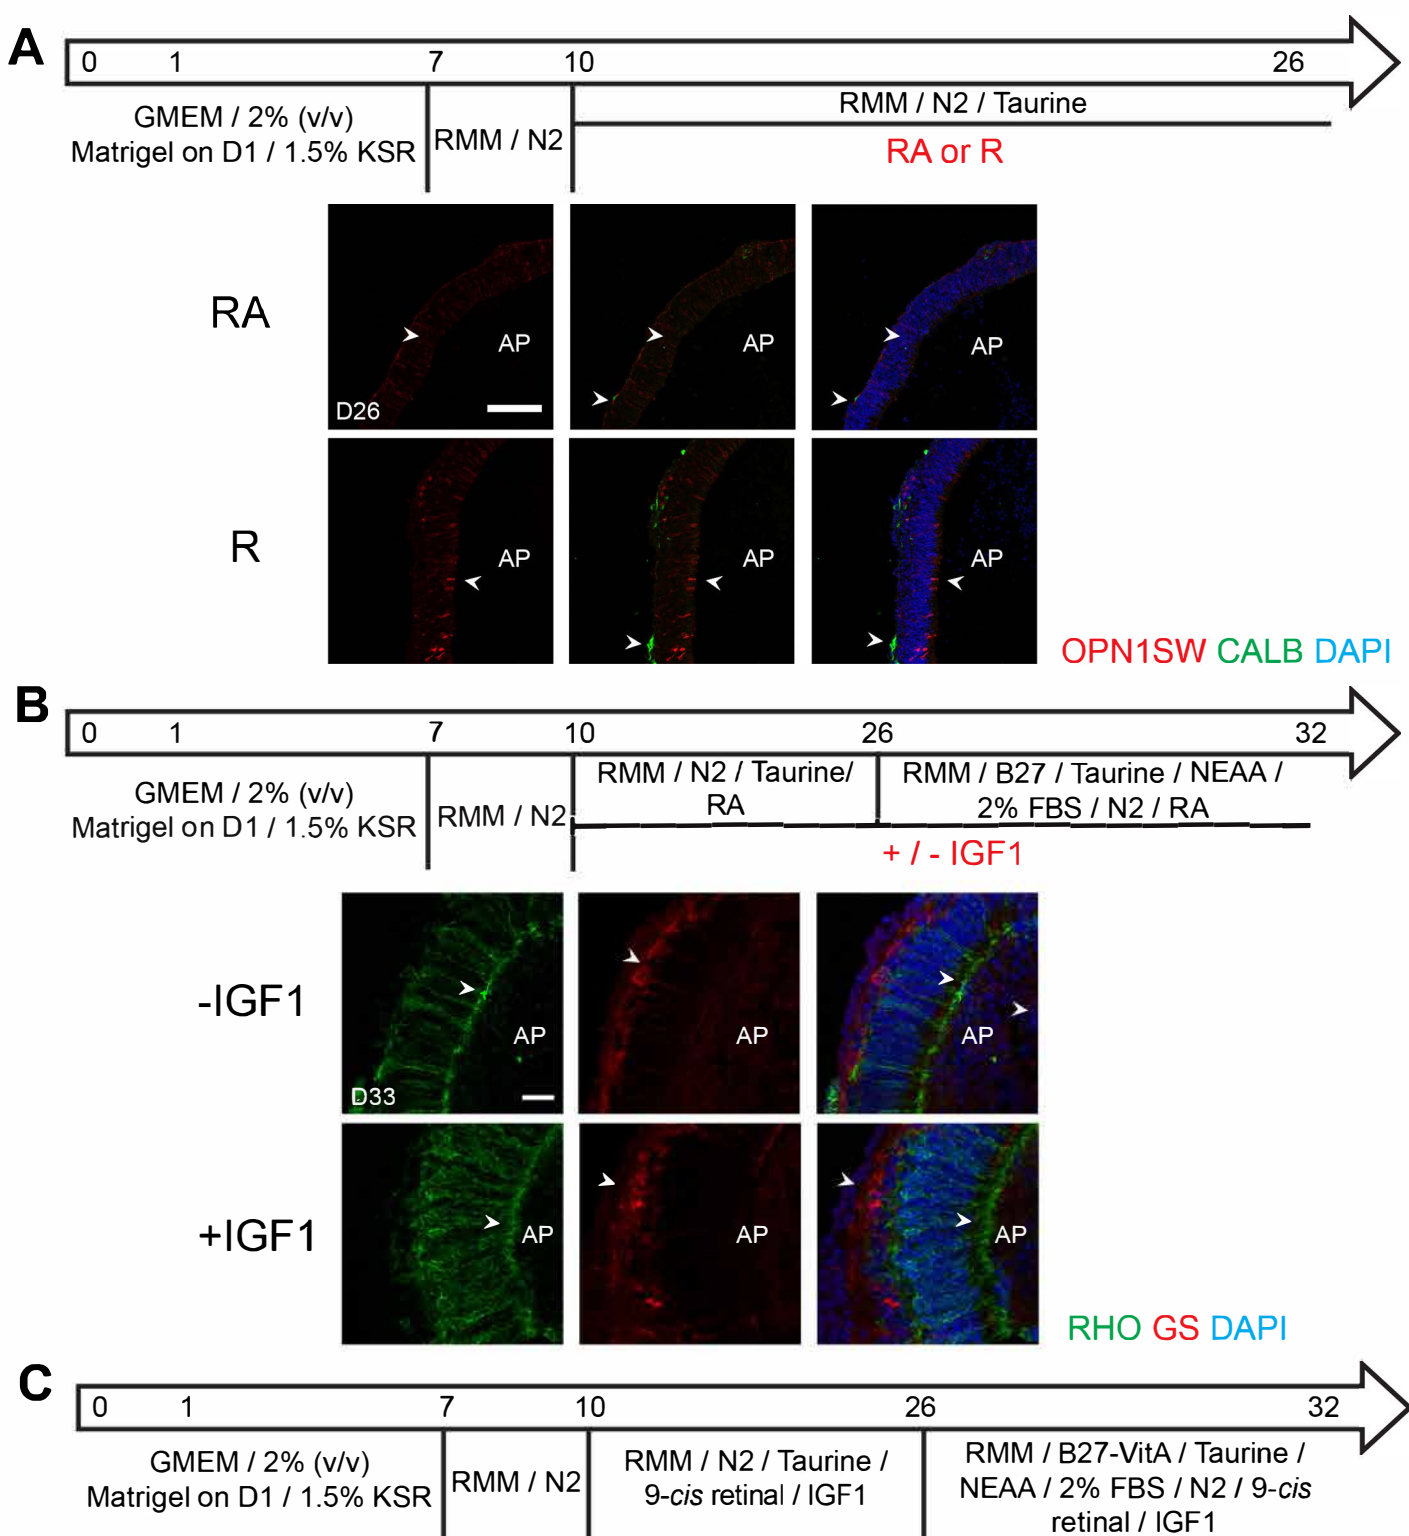

**Figure S2 (related to Figure 1E)**

**Modification of the HIPRO protocol.** (A) *9-cis* Retinal (R) versus *all-trans* Retinoic Acid (RA). S-opsin (OPN1SW, Red) and paired box protein 6 (PAX6, Green) are markers of S-cone photoreceptors and amacrine/ganglion cells, respectively. (B) Addition of insulin-like growth factor 1 (IGF1). Numbers in arrows show the differentiation day. GMEM: Glasgow minimum essential medium; KSR: knockout serum replacement; RMM: retinal maturation medium constituted of DMEM/F12 with GlutaMAX, 1x penicillin/streptomycin, 1x 2-mercaptoethanol and 1x N2 supplement; RA: *all-trans* retinoic acid; R: *9-cis* retinal; NEAA: non-essential amino acids; FBS: fetal bovine serum; B27: B27 supplement; N2: N2 supplement; B27-VitA, B27 supplement without Vitamin A; IGF1: insulin-like growth factor 1. Rhodopsin (RHO, green) and glutamine synthetase (GS, red) are markers for rod photoreceptors and Müller glia, respectively. All nuclei were stained with 4',6-diamidino-2-phenylindole (DAPI, blue). Representative figures are shown for each condition. Arrowheads indicate relevant immunostaining with (A) OPN1 SW, CALB, (B) RHO and GS. AP shows the apical side of the organoids. Scale bar: (A) 50  $\mu$ m, and (B) 20  $\mu$ m.

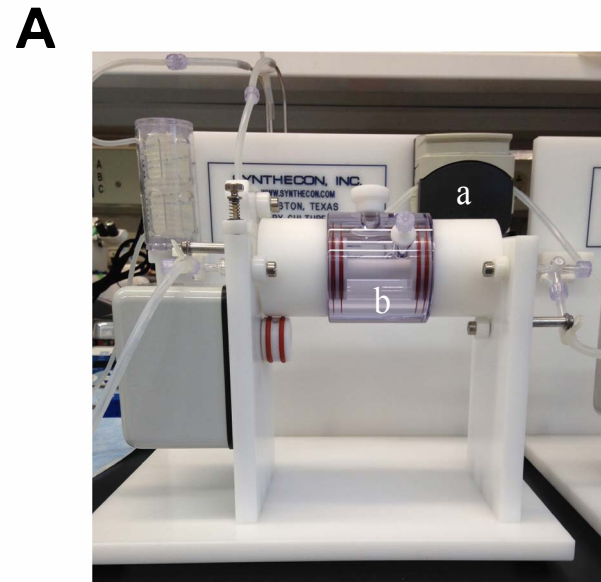

**B**

(1) 
$$V_t = \frac{2gr^2(\rho_{NR} - \rho_f)}{9\mu\rho_f}$$

(2) 
$$\tau_{max} = \frac{3\mu V_t}{2r}$$

| Parameter    | Description                      |
|--------------|----------------------------------|
| $V_t$        | Terminal velocity                |
| $\tau_{max}$ | Maximum shear stress             |
| $g$          | Acceleration due to gravity      |
| $r$          | Radius of neural retina          |
| $\rho_{NR}$  | Density of neural retina         |
| $\rho_f$     | Density of cell culture medium   |
| $\mu$        | Viscosity of cell culture medium |

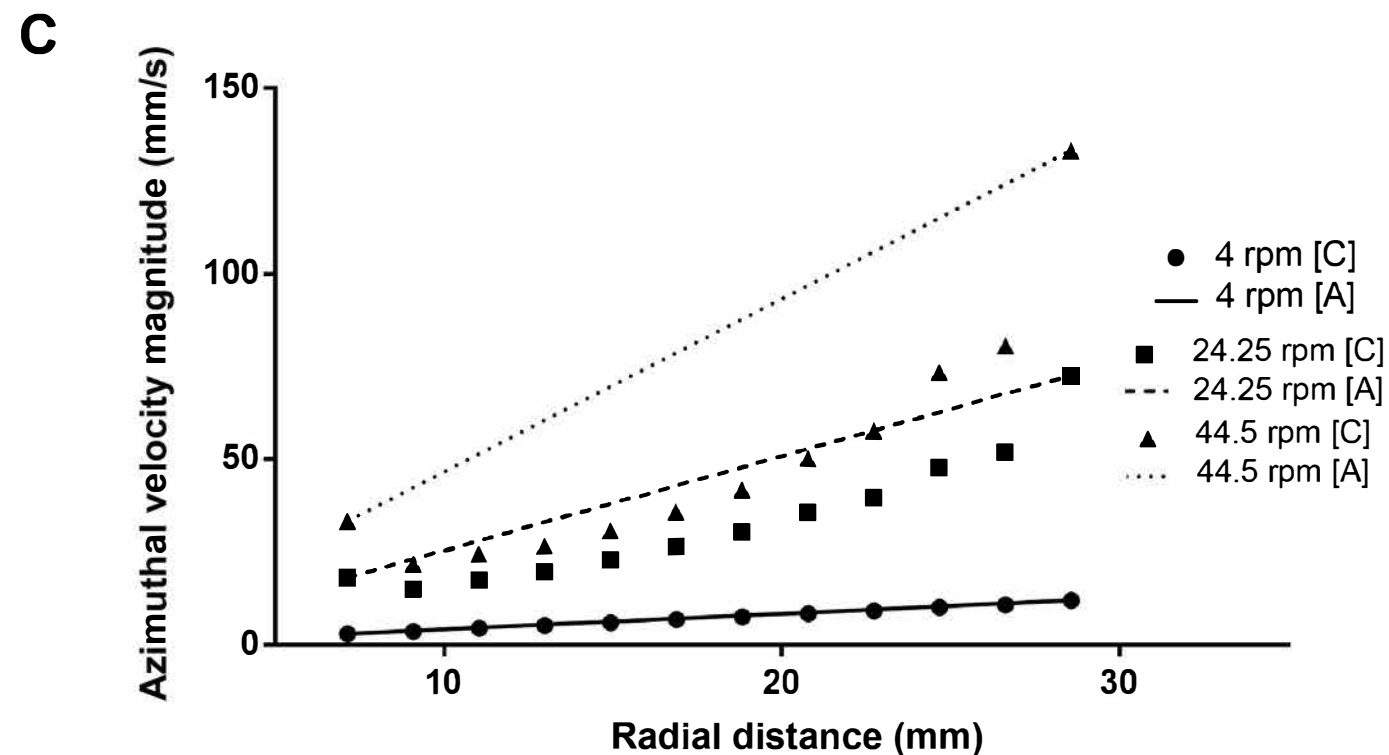

| RWV Operating Speed (rpm) | Tangential Velocity (mm/s) | Reynolds Number |
|---------------------------|----------------------------|-----------------|
| 4.0                       | 11.97                      | 333.73          |
| 24.3                      | 72.56                      | 2023.11         |
| 44.5                      | 133.16                     | 3712.77         |

**Figure S3 (related to Figure 1F-G)**

**Characterization of rotating-wall vessel bioreactor (RWV).** (A) Commercially purchased RWV from Synthecon with (a) perfusion pump and (b) perfusion vessel. (B) Governing RWV equations regarding: (1) Analytical solution of the NR terminal velocity as a function of NR density and radius. (2) Analytical solution of maximum shear stress applied to NR by cell culture medium as a function of NR terminal velocity and radius. (C) RWV analytical flow profile [A] and CFD simulations [C] across minimum to maximum rotation speeds. Accompanying tangential (azimuthal) velocities and Reynolds Numbers are reported at the largest radial distance in the RWV and correspond to maximum values for all rotation speeds. For experimentation, rotational speeds were chosen under 24.3 rpm to remain below the transition to turbulent flow. Typically the organoids were maintained at radial distances between 10 to 25 mm from the center of the perfusion core during NR development.





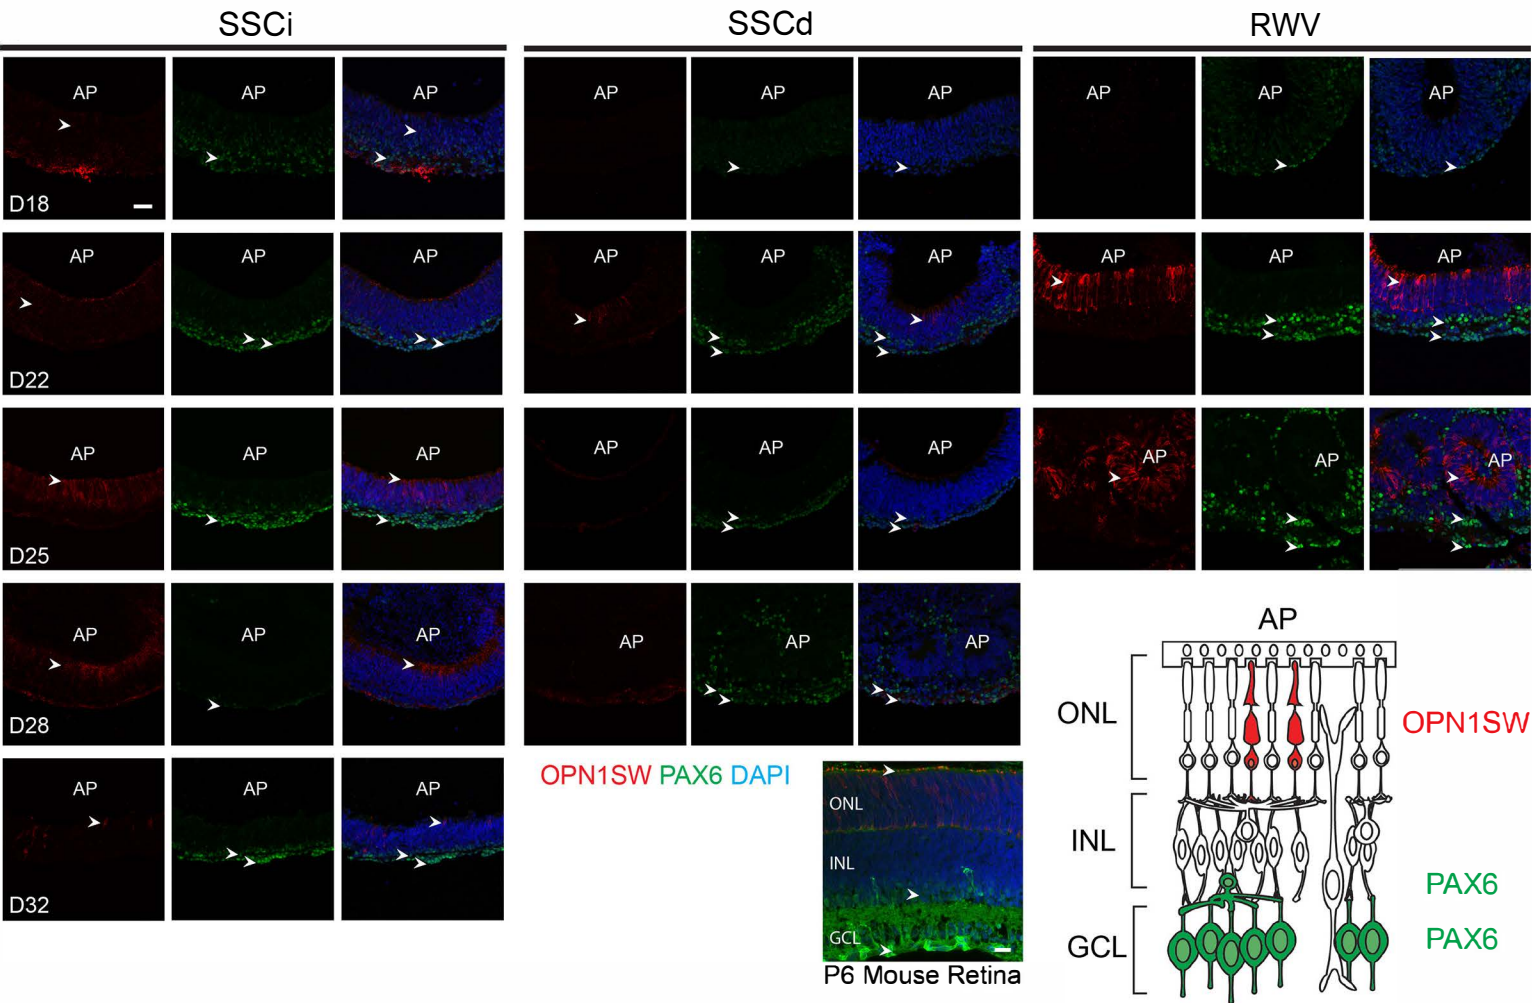

**Figure S5 (related to Figure 3C)**

**Development of cone photoreceptors and amacrine/ganglion cells, followed by the formation of plexiform layers.** S-opsin (OPN1SW, Red) and paired box protein 6 (PAX6, Green) are markers of S-cone photoreceptors and amacrine/ganglion cells, respectively. Nuclei were stained with 4',6-diamidino-2-phenylindole (DAPI, blue). Representative figures are shown. Arrowheads indicate relevant immunostaining with OPN1SW and PAX6. AP shows the apical side of the organoids. Scale bar = 50  $\mu$ m (organoids), and 20  $\mu$ m (mouse retina).

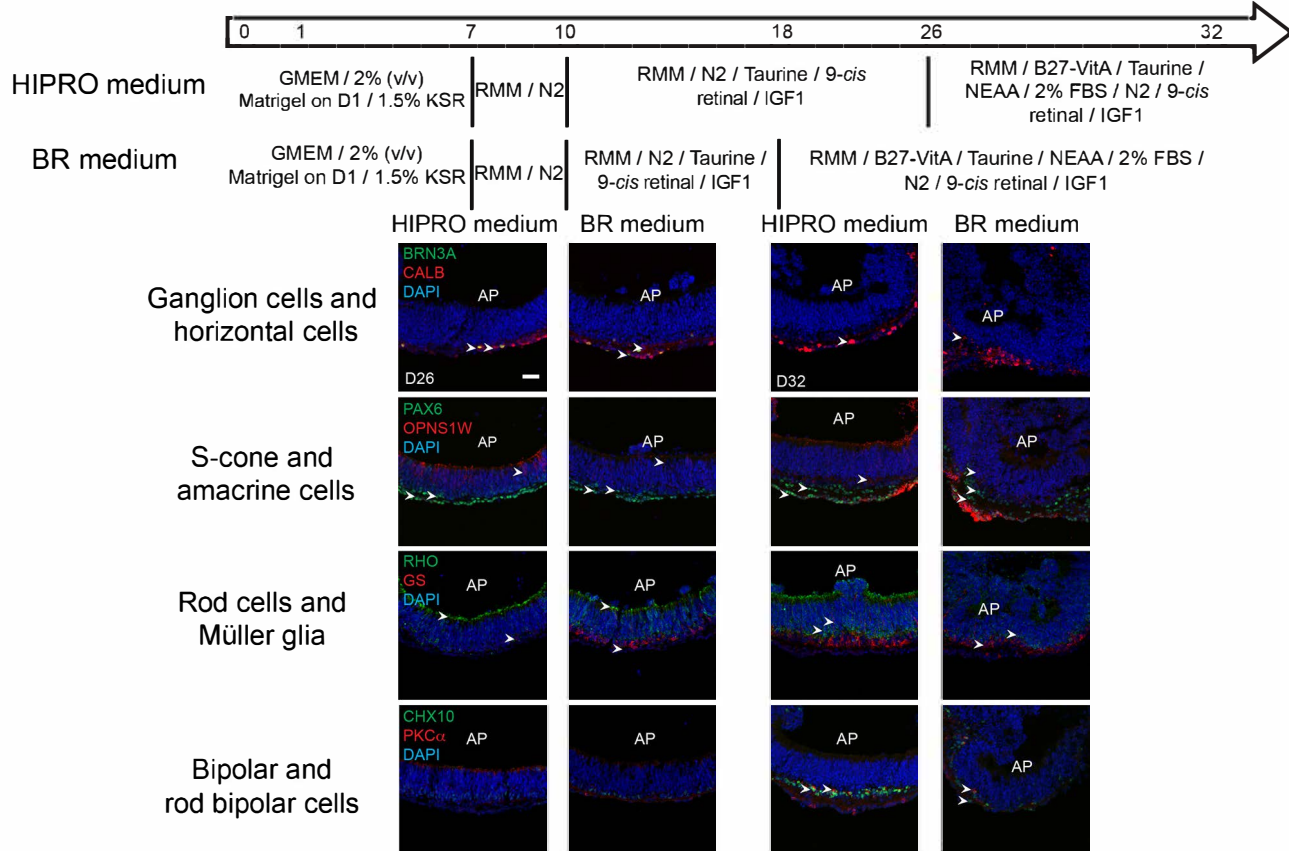

**Figure S6 (related to Figure 3-5)**

**HIPRO medium versus bioreactor (BR) medium for intact static suspension culture (SSCi) organoids.** Numbers in arrows show the differentiation day. GMEM: Glasgow minimum essential medium; KSR: knockout serum replacement; RMM: retinal maturation medium constituted of DMEM/F12 with GlutaMAX, 1x penicillin/streptomycin, 1x 2-mercaptoethanol and 1x N2 supplement; NEAA: non-essential amino acids; FBS: fetal bovine serum; N2: N2 supplement; B27-VitA: B27 supplement without Vitamin A; IGF 1: insulin-like growth factor 1. Brain-specific homeobox/POU domain protein 3a (BRN3A, Green), Calbindin (CALB, red), paired box protein 6 (PAX6, Green), S-opsin (OPN1SW, Red), Rhodopsin (RHO, green), glutamine synthetase (GS, red), chx-10 homeodomain-containing homolog 10 (CHX10, green), and protein kinase C alpha (PKC $\alpha$ , red) are markers for ganglion, horizontal, S-cone photoreceptor, amacrine, rod photoreceptor, Müller glia, bipolar and rod bipolar cells, respectively. Nuclei were stained with 4',6-diamidino-2-phenylindole (DAPI, blue). Representative figures are shown. Arrowheads indicate relevant immunostaining with BRN3A, CALB, PAX6, RHO, GS, CHX10 and PKC $\alpha$ . AP shows apical side of the organoids. Scale bar = 50  $\mu$ m.

**Table S2. Antibody information and dilutions (related to Supplemental Experimental Procedures)**

| <b>Antibody</b>                                       | <b>Host</b> | <b>Source</b>                                                         | <b>Cat. no.</b> | <b>Dilution</b> |
|-------------------------------------------------------|-------------|-----------------------------------------------------------------------|-----------------|-----------------|
| ADP-ribosylation factor-like protein 13B (ARL13B)     | Rabbit      | Abcam                                                                 | ab83879         | 1:500           |
| Bassoon                                               | Rabbit      | Cell Signaling                                                        | 6897S           | 1:200           |
| Brain-specific homeobox/POU domain protein 3A (BRN3A) | Mouse       | Millipore                                                             | MAB1585         | 1:200           |
| Calbindin (CALB)                                      | Rabbit      | Calbiochem                                                            | PC253L          | 1:1000          |
| Ceh-10 Homeodomain-Containing Homolog (CHX10)         | Sheep       | Abcam                                                                 | ab16141         | 1:200           |
| Glutamine synthetase (GS)                             | Rabbit      | Abcam                                                                 | ab49873         | 1:200           |
| Laminin                                               | Rabbit      | Sigma-Aldrich                                                         | L9393           | 1:50            |
| Opsin 1 short-wave-sensitive (OPN1SW)                 | Goat        | Santa Cruz                                                            | sc-14363        | 1:200           |
| Paired box protein 6 (PAX6)                           | Mouse       | DSHB                                                                  | PAX6-c          | 1:200           |
| Phospho-histone H3 (PH3)                              | Rabbit      | Cell signaling                                                        | 9701L           | 1:200           |
| Protein kinase C alpha (PKC $\alpha$ )                | Rabbit      | Sigma-Aldrich                                                         | P4334           | 1:1000          |
| Rhodopsin (RHO)                                       | Mouse       | A gift from Dr. Robert Molday, University of British Columbia, Canada | ---             | 1:500           |
| $\gamma$ -Tubulin                                     | Mouse       | Sigma-Aldrich                                                         | T6557           | 1:500           |
| Orthodenticle homeobox 2 (OTX2)                       | Rabbit      | Sigma-Aldrich                                                         | HPA000633       | 1:200           |
| Synaptophysin                                         | Mouse       | Abcam                                                                 | ab8049          | 1:200           |



## Supplemental Experimental Procedures

### Generation and maintenance of mouse embryonic stem cells

Mouse wild-type (WT) embryonic stem cells (ESCs) were isolated from the inner cell mass (ICM) of 3.5-day blastocyst of *Nrl*-GFP transgenic mice (Akimoto et al., 2006). A second WT ESC clone (R1) (Nagy et al., 1993) was obtained from A. Nagy, Lunenfeld-Tanenbaum Research Institute of Mount Sinai Hospital, Toronto, Canada. ESCs were maintained on feeders of mouse embryonic fibroblasts in the presence of leukemia inhibitory factor (LIF) (Millipore) at 37°C, 5% CO<sub>2</sub> (Ying et al., 2008). ESC clones were characterized by morphology, proliferation rate and expression of pluripotency markers (Chen, 2016). Maintenance medium of ESC culture consists of Knockout DMEM (Life Technologies) supplemented with 1x MEM non-essential amino acids (NEAA) (Sigma), 1x GlutaMAX (Life Technologies), 1x Penicillin-Streptomycin (PS) (Life Technologies), 1x 2-Mercaptoethanol (2-ME) (Life Technologies), 2000 U/ml LIF (Millipore), and 15% ES cell-qualified fetal bovine serum (FBS) (Life Technologies). Cells were passaged using TrypLE Express (Life Technologies) every three days.

### Differentiation of ESCs into retinal organoids

ESCs were differentiated into retinal organoids using modified HIPRO protocol, as described (Chen, 2016). After dissociation and removal of feeder cells, 3000 ESCs were plated in each well of PrimeSurface low adhesion U-shaped 96-well plate (Wako) with retinal differentiation medium constituted by Glasgow minimum essential medium (Life Technologies), 1x NEAA (Sigma), 1x sodium pyruvate (Sigma), 1x 2-ME (Life Technologies) and 1.5%(v/v) knockout serum replacement (Life Technologies). At differentiation day (D)1, 120 ul >9.5 mg/ml Matrigel (Corning) was diluted in 900 ul retinal differentiation medium. 20 ul of the diluted Matrigel was added to each well. Retinal organoids were transferred at D7 to a 100 mm Poly(2-hydroxyethyl methacrylate) (Sigma)-coated petri dish with 10 ml retinal maturation medium (DMEM/F12 with GlutaMAX (Life Technologies) with 1x 2-ME (Life Technologies) and 1x PS (Life Technologies). At D10, optic cups of retinal organoids were dissected from intact retinal organoids using a moria nickel-plated pin holder (Fine Science Tools) with 0.25 mm-diameter tungsten needles (Fine Science Tools). Dissected NR in static suspension culture (SSCd) or rotating-wall vessel bioreactors (RWB) were supplied with DMEM/F12 with GlutaMAX (Life Technologies), 1x 2-ME (Life Technologies), 1x PS (Life Technologies), 1x N2 supplement (Life Technologies), 1 mM taurine (Sigma), 500 nM 9-*cis* retinal (Sigma) and 100 ng/ml insulin-like growth factor 1 (IGF1) (Life Technologies). From D18 and onwards, 1x NEAA (Sigma), 1x B27 without Vitamin A (Life Technologies) and 2%(v/v) FBS (Atlanta Biologicals) were added to the culture. Intact organoids in static suspension culture (SSCi) were maintained in the same media, except 1x MEM non-essential amino acid (Sigma), 1x B27 without Vitamin A (Life Technologies) and 2% (v/v) FBS (Atlanta Biologicals) were added from D26 and onwards. Half-media exchanges were carried out every two days for all three conditions. The cultures were incubated in 5% O<sub>2</sub> from D0 to D10 and with 20% O<sub>2</sub> from D10 onwards.

### Immunohistochemistry (IHC)

Organoids were fixed in 4% paraformaldehyde (PFA) (Electron Microscopy Science) for 1 hour and cryo-protected in 15% (v/v) sucrose (Sigma) for at least 2 hours, followed by 30% (v/v) sucrose (Sigma) overnight, before embedding in OCT compound (Sakura Finetek). OCT blocks were sectioned at 10 μm thickness and incubated under vacuum at room temperature for at least 30 minutes, before immunostaining or storage at -80°C. Sections were hydrated in Tris-buffered Saline (TBS) (Quality Biological) for 10 minutes and incubated in blocking solution (10% (v/v) normal donkey serum and 1% (w/v) bovine serum albumin (BSA) (Sigma)) for at least 1 hour at room temperature. After incubation with primary antibody, which was diluted in blocking solution (1xTBS, 10% donkey serum and 1% BSA) overnight at 4°C, slides were washed three times for 10 minutes each with 0.05% (v/v) Triton X-100 (Sigma) in TBS, followed by 5-minute wash with TBS. Slides were then stained with appropriate secondary antibodies at room temperature for 1.5 hours. After three 10-minute washes, DAPI (4',6-diamidino-2-phenylindole)(Life Technologies) was added for 5 minutes, followed by three washes, 5 minutes each, in TBS. For comparison of intensity, images in the same section were captured using identical gain and voltage. Fluorescence images were captured using LSM 880 confocal microscope (Zeiss). Information and dilutions of antibodies are summarized in Table S2.

### Transcriptome analysis

Gene level quantification of RNA-seq data from *in vivo* mouse retina (Brooks, et al., manuscript in preparation) and *in vitro* organoids was performed as described (Chen, 2016) with Ensembl data release 88 (Aken et al., 2017). The gene level count-matrix was then TMM normalized using the edgeR (3.32.2) (McCarthy et al., 2012; Robinson et al., 2010) package in the R (v3.4.0) ( R Development Core Team, 2017) programming environment.

Differential expression (DE) analysis of the organoid data was performed for each time-wise culturing condition using limma (3.32.2) (Ritchie et al., 2015) with voom (Law et al., 2014) and eBayes functions. Genes having a mean of 10 counts-per-million (CPM) expression in at least one group were used in the analysis and those showing Benjamini-Hochberg false discovery rate (FDR) of < 1% and minimum fold change of 5 were considered in significant DE category.

Gene expression clustering was performed on the significantly DE genes using Affinity propagation (AP) algorithm (Bodenhofer et al., 2011; Frey and Dueck, 2007) in a two-step process. The first step consisted of using negative distance as the similarity measure, followed by determination of the exemplars for the 27 clusters identified. In the second step, the exemplars from the first step are clustered using Pearson's correlation as the similarity measure and the 27 clusters were merged to obtain the final 5 super-clusters.

Gene ontology (GO) analysis was performed for each cluster using clusterProfiler (Yu et al., 2012) package. To reduce inherent redundancy associated with GO analysis, semantic similarity analysis was performed using Wang similarity (Wang et al., 2007; Yu et al., 2010) in the GOSemSim (3.32.2) package. Similarity matrices were then clustered using AP with q parameter of 0.85. The leaf term in the GO tree based on GO.db (Carlson, 2017) was selected as the representative.

### **Statistical Analysis**

At least four independent experiments were performed. All data were expressed as mean  $\pm$  standard error of the mean (S.E.M.), unless specified otherwise. One-way ANOVA was used to compare NR size for the three culture conditions at specific time points and Tukey's test was used as Posthoc test.  $p < 0.05$  was considered significant. All statistical analyses were carried out using R programming ( R Development Core Team, 2017).

## Experimental References

- Aken, B.L., Achuthan, P., Akanni, W., Amode, M.R., Bernsdorff, F., Bhai, J., Billis, K., Carvalho-Silva, D., Cummins, C., Clapham, P., *et al.* (2017). Ensembl 2017. *Nucleic Acids Res* *45*, D635-D642.
- Akimoto, M., Cheng, H., Zhu, D., Brzezinski, J.A., Khanna, R., Filippova, E., Oh, E.C., Jing, Y., Linares, J.L., Brooks, M., *et al.* (2006). Targeting of GFP to newborn rods by Nrl promoter and temporal expression profiling of flow-sorted photoreceptors. *Proc Nat Acad Sci USA* *103*, 3890-3895.
- Bodenhofer, U., Kothmeier, A., and Hochreiter, S. (2011). APCluster: an R package for affinity propagation clustering. *Bioinformatics* *27*, 2463-2464.
- Carlson, M. (2017). GO.db: A set of annotation maps describing the entire Gene Ontology. 3.4.1 ed.
- Frey, B.J., and Dueck, D. (2007). Clustering by passing messages between data points. *Science* *315*, 972-976.
- Law, C.W., Chen, Y., Shi, W., and Smyth, G.K. (2014). voom: Precision weights unlock linear model analysis tools for RNA-seq read counts. *Genome Biol* *15*, R29.
- McCarthy, D.J., Chen, Y., and Smyth, G.K. (2012). Differential expression analysis of multifactor RNA-Seq experiments with respect to biological variation. *Nucleic Acids Res* *40*, 4288-4297.
- Nagy, A., Rossant, J., Nagy, R., Abramow-Newerly, W., and Roder, J.C. (1993). Derivation of completely cell culture-derived mice from early-passage embryonic stem cells. *Proc Nat Acad Sci USA* *90*, 8424-8428.
- Ritchie, M.E., Phipson, B., Wu, D., Hu, Y., Law, C.W., Shi, W., and Smyth, G.K. (2015). limma powers differential expression analyses for RNA-sequencing and microarray studies. *Nucleic Acids Res* *43*, e47.
- Robinson, M.D., McCarthy, D.J., and Smyth, G.K. (2010). edgeR: a Bioconductor package for differential expression analysis of digital gene expression data. *Bioinformatics* *26*, 139-140.
- R Development Core Team (2017). R: A Language and Environment for Statistical Computing (Vienna, Austria: R Foundation for Statistical Computing).
- Wang, J.Z., Du, Z., Payattakool, R., Yu, P.S., and Chen, C.F. (2007). A new method to measure the semantic similarity of GO terms. *Bioinformatics* *23*, 1274-1281.
- Ying, Q.L., Wray, J., Nichols, J., Battle-Morera, L., Doble, B., Woodgett, J., Cohen, P., and Smith, A. (2008). The ground state of embryonic stem cell self-renewal. *Nature* *453*, 519-523.
- Yu, G., Li, F., Qin, Y., Bo, X., Wu, Y., and Wang, S. (2010). GOSemSim: an R package for measuring semantic similarity among GO terms and gene products. *Bioinformatics* *26*, 976-978.
- Yu, G., Wang, L.G., Han, Y., and He, Q.Y. (2012). clusterProfiler: an R package for comparing biological themes among gene clusters. *Omics* *16*, 284-287.
